# Supplementary material for: Dihydroxo-bridged diuranyl(vi) complexes with 2-((2-(6-chloropyridazin-3-yl)hydrazono)methyl)-4-R-phenols: structural insights and visible light driven photocatalytic activities
Source: Royal Society of Chemistry journal article supplement (doi:10.1039/c8nj05038d), 2018-11-28
Supplement: c8nj05038d1.pdf [file c8nj05038d1.pdf]

## Supplementary Information

*New Journal of Chemistry*

Dihydroxo-bridged diuranyl(VI) complexes with 2-((2-(6-chloropyridazin-3-yl)hydrazono)methyl)-4-R-phenols: Structural insight and visible light driven photocatalytic activities

Sabari Ghosh, Ankit Kumar Srivastava and Samudranil Pal\*

*School of Chemistry, University of Hyderabad, Hyderabad 500 046, India*

\*Corresponding author

*E-mail:* spal@uohyd.ac.in

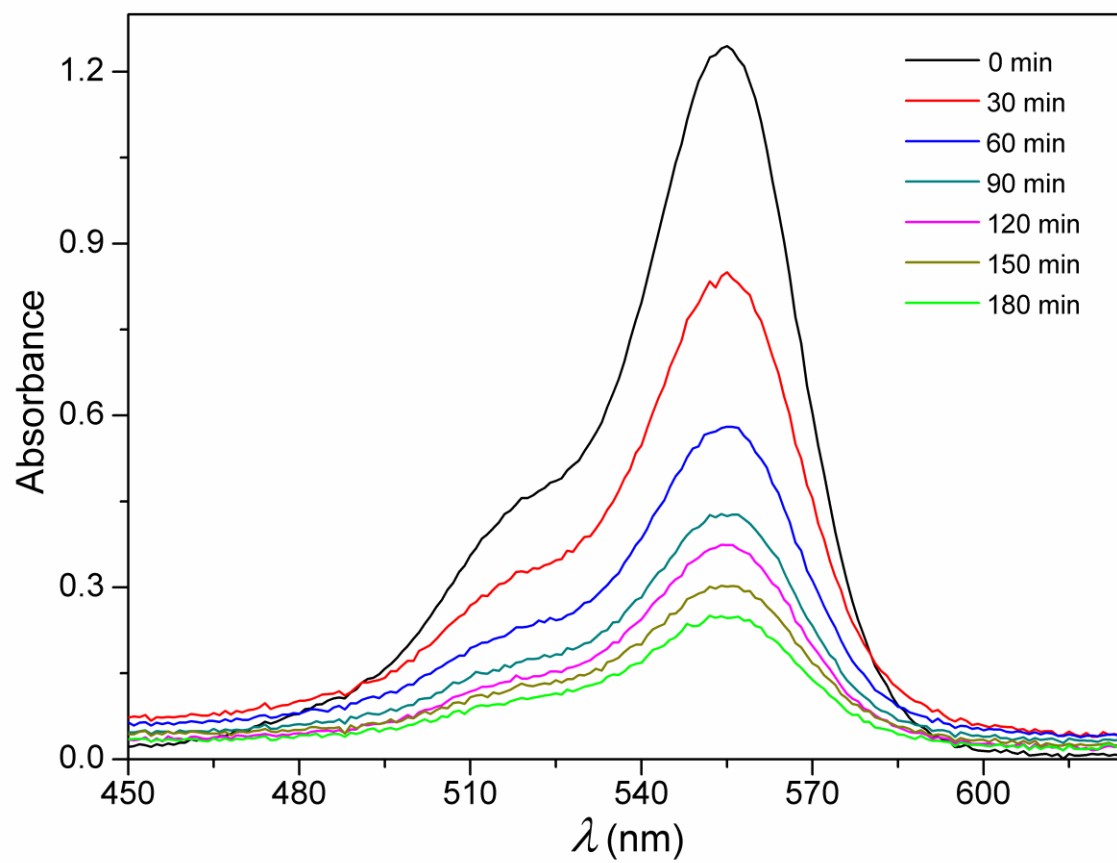

**Fig. S1** Photodegradation of Rhodamine B (RhB) under visible light irradiation in presence of  $[(\text{UO}_2)_2(\mu\text{-OH})_2(\text{L}^1)_2]$  (**1**) as catalyst.

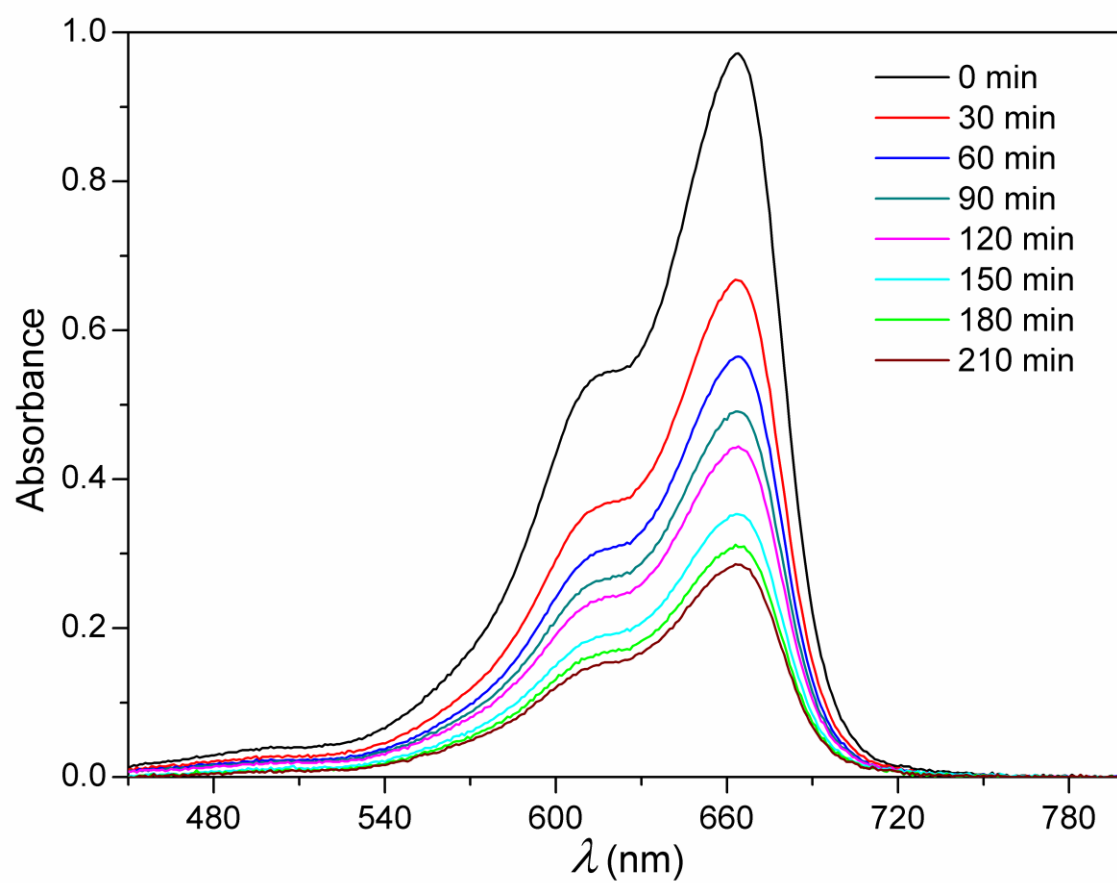

**Fig. S2** Photodegradation of Methylene Blue (MB) under visible light irradiation in presence of  $[(\text{UO}_2)_2(\mu\text{-OH})_2(\text{L}^1)_2]$  (**1**) as catalyst.

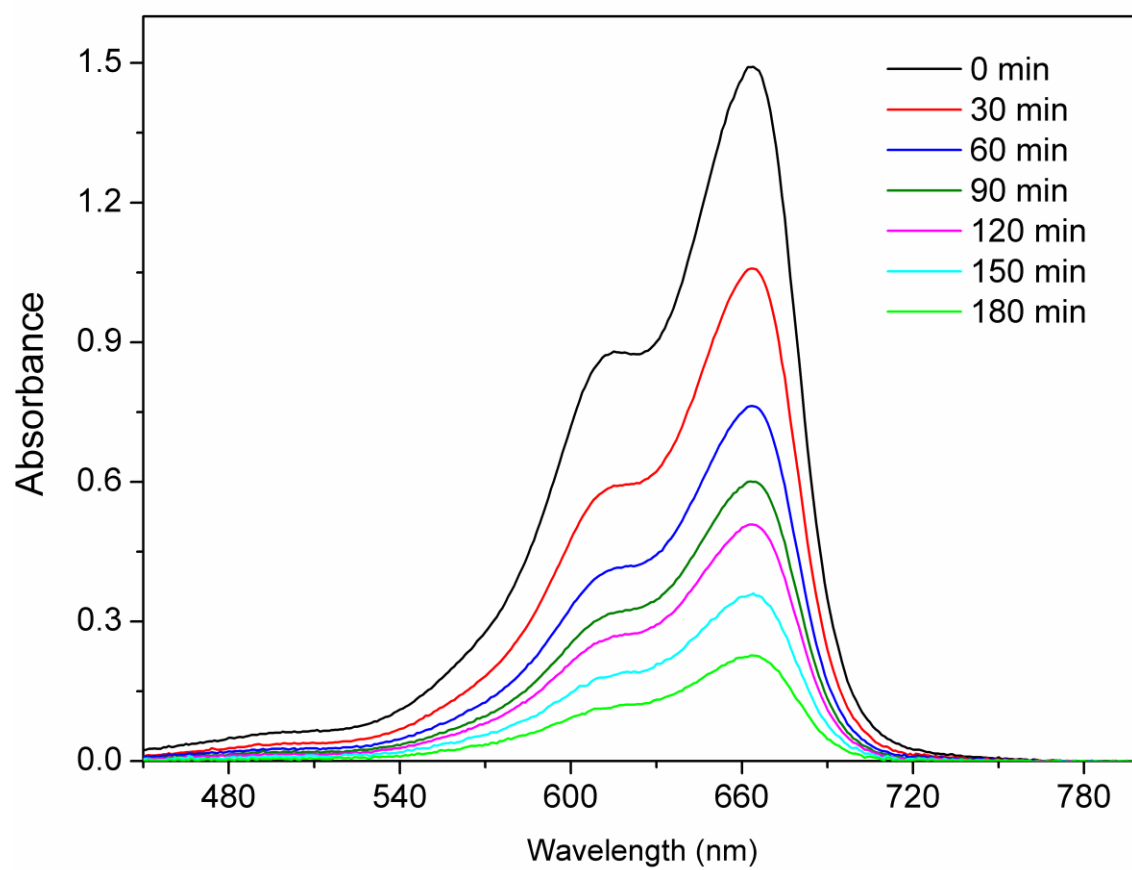

**Fig. S3** Photodegradation of Methylene Blue (MB) under visible light irradiation in presence of  $[(\text{UO}_2)_2(\mu\text{-OH})_2(\text{L}^2)_2]$  (**2**) as catalyst.
